# Supplementary material
Source: HighWire-hosted journal article supplement (https://www.canjsurg.ca/highwire/filestream/96809/field_highwire_adjunct_files/0/cjs-001018-1-at.pdf)
Supplement: cjs-001018-1-at.pdf [file cjs-001018-1-at.pdf]

DOI: 10.1503/cjs.001018

Copyright © 2019 The Author(s) or their employer(s).

To receive this resource in an accessible format, please contact us at [cmajgroup@cmaj.ca](mailto:cmajgroup@cmaj.ca).

Online appendices are unedited and posted as supplied by the authors.

### Characteristics of Previous Systematic Reviews

| Study                     | Drug name(s)                                                            | Dose          | Route of admin.                  | Frequency of admin. | Included studies                                              | Control                          | Duration            | Pain Outcomes                                                                        |
|---------------------------|-------------------------------------------------------------------------|---------------|----------------------------------|---------------------|---------------------------------------------------------------|----------------------------------|---------------------|--------------------------------------------------------------------------------------|
| <i>Systematic Reviews</i> |                                                                         |               |                                  |                     |                                                               |                                  |                     |                                                                                      |
| Campbell 2001             | THC extract, nitrogen analog (NIB), levonantradol, benzopyrano-peridine | 1.5-10 mg     | Oral capsules, intramuscular     | NR                  | 9 RCTs (222 patients); 2 trials of post-surgical pain         | Codeine, secobarbital, placebo   | NR                  | VAS or SPID<br>= / -                                                                 |
| Covarrubias-Gomez 2008*   | NR                                                                      | NR            | NR                               | NR                  | 41 studies                                                    | NR                               | NR                  | Pain measure NR<br>+                                                                 |
| Deshpande 2015            | Herbal cannabis                                                         | Various       | Smoked, vaporized                | Various             | 6 RCTs (226 patients); 1 RCT post-trauma pain                 | Placebo cigarettes               | 17 days to 8 weeks  | VAS and unspecified pain measure<br>+                                                |
| Fitzcharles 2016          | Nabiximols                                                              | NR            | Oral spray                       | NR                  | 4 RCTs (201 patients); 2 studies (132 patients) arthritis     | Placebo, amytryptiline, naproxen | 2-8 weeks           | VAS, unspecified daily pain scale<br>=                                               |
|                           | Nabilone                                                                | 0.5-1mg       | Oral capsule                     |                     |                                                               |                                  |                     |                                                                                      |
|                           | FAAH inhibitor                                                          | NR            | NR                               |                     |                                                               |                                  |                     |                                                                                      |
| Hwang 2016                | Natural cannabis, nabiximols, dronabinol, nabilone, THC extract         | 250 µg and up | Smoked, oral spray, oral capsule | Various             | 33 RCTs (2014 patients); 1 study (23 patients) trauma/surgery | Placebo, dihydrocodeine          | 8 hours – 24 months | VAS, unspecified 11 point scale, McGill, descriptor differential scale, NRS<br>+ / = |
| Khaiser 2016              | Natural cannabis,                                                       | 1%-9% THC     | Smoked, vaporized,               | 1-12 inhalations    | 11 studies (420 patients); (23                                | Low dose cannabis,               | 5-21 days           | VAS, NRS, descriptor                                                                 |

Online appendices are unedited and posted as supplied by the authors.

|                     |                                                                       |                                  |                                             |                      |                                                                       |                                                     |                   |                                                                                              |
|---------------------|-----------------------------------------------------------------------|----------------------------------|---------------------------------------------|----------------------|-----------------------------------------------------------------------|-----------------------------------------------------|-------------------|----------------------------------------------------------------------------------------------|
|                     | dronabinol                                                            |                                  | edible, topical                             | per session; some NR | patients) trauma/surgery                                              | placebo,                                            |                   | differential scale, global impression of change, McGill<br>+                                 |
| Kung 2011*          | NR                                                                    | NR                               | NR                                          | NR                   | 4 RCTs (218 patients); all MSK                                        | NR                                                  | NR                | Pain measure NR<br>+                                                                         |
| Lynch 2015          | Nabilone, natural cannabis, FAAH inhibitor, THC extract,              | NR                               | Smoked, oral spray, vaporized, oral capsule | NR                   | 11 studies (1135 patients); 1 study (74 patients) arthritis           | Amytryptiline, ibuprofen, placebo                   | 3 days – 14 weeks | McGill, VAS, WOMAC pain, NRS, BPI, neuropathic pain scale<br>+                               |
| MacFarlane 2011     | Nabiximols                                                            | Mean 14.6 mg THC and 13.5 mg CBD | Oral spray                                  | Daily                | 1 RCT (58 arthritis patients); -SR of 34 RCTs on alternative medicine | Placebo                                             | 5 weeks           | McGill, NRS<br>+                                                                             |
| Martin-Sanchez 2009 | THC extract, nabilone, Nitrogen analog (NIB), dronabinol, CBD extract | 0.5 mg and up                    | Oral spray, oral capsules                   | NR                   | 18 RCTs (809 patients); 1 study (58 patients) arthritis               | Codeine, placebo, secobarbital                      | 5 days – 16 weeks | NRS, VAS, 11-point box text, subjective pain assessment<br>+ (but possible harms identified) |
| Stevens 2017        | Nabilone, THC extract, levonantradol, dronabinol                      | 1-3 mg                           | Oral capsules, intramuscular                | NR                   | 7 RCTs (611 surgical patients)                                        | Ketoprofen, placebo, pethidine, naproxen, ibuprofen | NR                | Pain measure NR<br>=                                                                         |

Online appendices are unedited and posted as supplied by the authors.

|                                                                                                                                                               |    |    |                                                                                                                                    |    |                                            |                                                                                                                                                  |                                       |      |
|---------------------------------------------------------------------------------------------------------------------------------------------------------------|----|----|------------------------------------------------------------------------------------------------------------------------------------|----|--------------------------------------------|--------------------------------------------------------------------------------------------------------------------------------------------------|---------------------------------------|------|
| Wang 2008                                                                                                                                                     | NR | NR | NR                                                                                                                                 | NR | 23 RCTs and 8 obs. studies (1932 patients) | Placebo                                                                                                                                          | Mean 2 weeks. Range 8 hours–12 months | None |
| <i>Legend</i>                                                                                                                                                 |    |    |                                                                                                                                    |    |                                            |                                                                                                                                                  |                                       |      |
|  - Cannabis performed significantly better than comparator for pain outcomes |    |    |  - Inconclusive or no difference on pain outcomes |    |                                            |  - Cannabis performed worse than comparator for pain outcomes |                                       |      |
